# Supplementary material
Source: PubMed Central journal article supplement (PMC8096684)
Supplement: NIHMS1680043-supplement-1.pdf [file NIHMS1680043-supplement-1.pdf]

## Supplementary Material

**Table S1. IUD Counseling and IUD Method Choice by Participant Age, History of *N gonorrhoeae* or *C trachomatis* and Multiple Partners (Odds Ratios from Adjusted GEE models)**

|                                   | Counseled on IUD (n=1335) |                  |        | Chose IUD Method (n=1342) |                  |       |
|-----------------------------------|---------------------------|------------------|--------|---------------------------|------------------|-------|
|                                   | %                         | aOR (95% CI)     | P      | %                         | aOR (95% CI)     | P     |
| <b>Age Group</b>                  |                           |                  |        |                           |                  |       |
| Adolescent                        | 41.6                      | 0.74 (0.53-1.02) | 0.065  | 11.4                      | 0.66 (0.46-0.95) | 0.025 |
| Young adult                       | 51.9                      | REF              | -      | 17.9                      | REF              | -     |
| <b>History of GC/CT</b>           |                           |                  |        |                           |                  |       |
| Yes                               | 51.7                      | 1.10 (0.83-1.47) | 0.83   | 21.1                      | 1.15 (0.81-1.63) | 0.426 |
| No                                | 49.7                      | REF              | -      | 15.5                      | REF              | -     |
| <b>Multiple partners, past 3m</b> |                           |                  |        |                           |                  |       |
| Yes                               | 46.3                      | 0.80 (0.61-1.05) | 0.101  | 12.4                      | 0.66 (0.46-0.95) | 0.025 |
| No                                | 50.5                      | REF              | -      | 17.4                      | REF              | -     |
| <b>Study arm</b>                  |                           |                  |        |                           |                  |       |
| Intervention                      | 62.4                      | 3.29 (2.37-4.56) | <0.001 | 19.0                      | 1.79 (1.28-2.50) | 0.001 |
| Control                           | 34.4                      | REF              | -      | 13.3                      | REF              | -     |

*Covariates included: race/ethnicity, insurance status, parity, prior LARC usage, practice setting. GC/CT: N gonorrhoeae or C trachomatis. CI: Confidence Intervals.*
